# Supplementary material for: SARS‐CoV‐2‐specific humoral and cellular immunity persists through 9 months irrespective of COVID‐19 severity at hospitalisation
Source: PubMed Central journal article supplement — Clin Transl Immunology. 2021 Jul 5;10(7):e1306. doi: 10.1002/cti2.1306 (PMC8256672; doi:10.1002/cti2.1306), 2021-07-05
Supplement: CTI2-10-e1306-s002.pdf [file CTI2-10-e1306-s002.pdf]

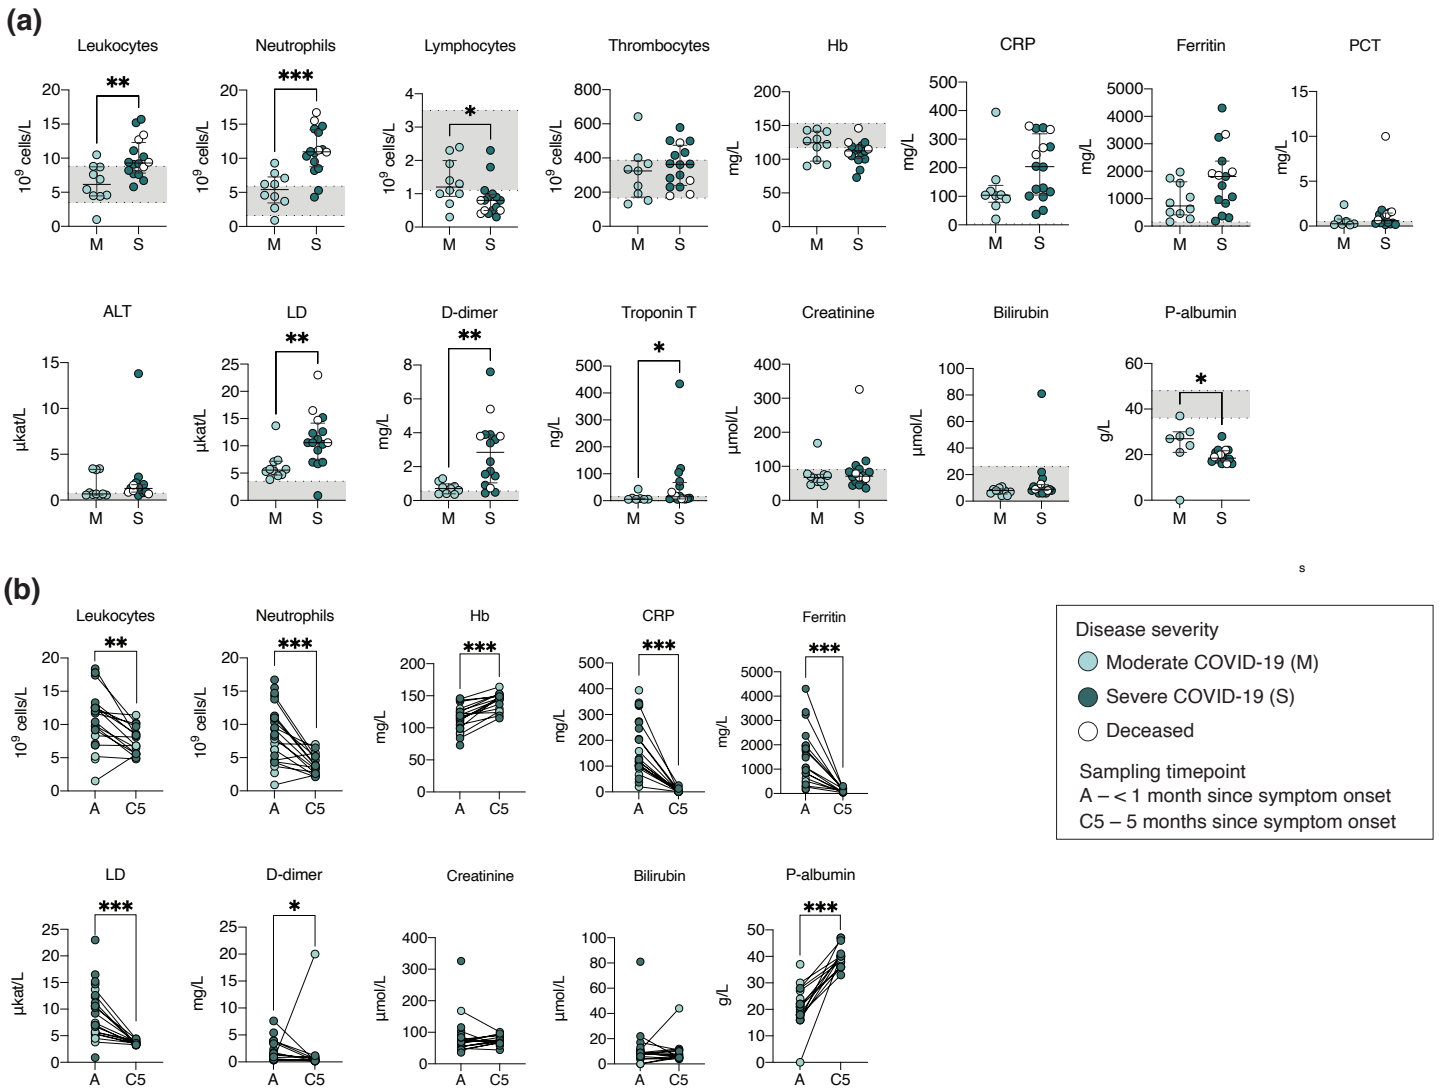

**Supplementary Figure 1. Clinical chemistry values in moderate and severe COVID-19 patients during acute disease and at 5-month convalescence. (a)** Comparison of cell counts, inflammation and organ damage marker levels in peripheral blood between moderate and severe COVID-19 patients during the acute phase. **(b)** Comparison of clinical chemistry values measured in patients during acute COVID-19 and at 5-month convalescence. Gray boxes indicate the range for reference values. Statistical significance in **(a)** was assessed by Mann-Whitney *U* test. Statistical significance in **(b)** was assessed by Wilcoxon signed-rank test. \* $P < 0.05$ , \*\* $P < 0.01$ , and \*\*\* $P < 0.001$ .

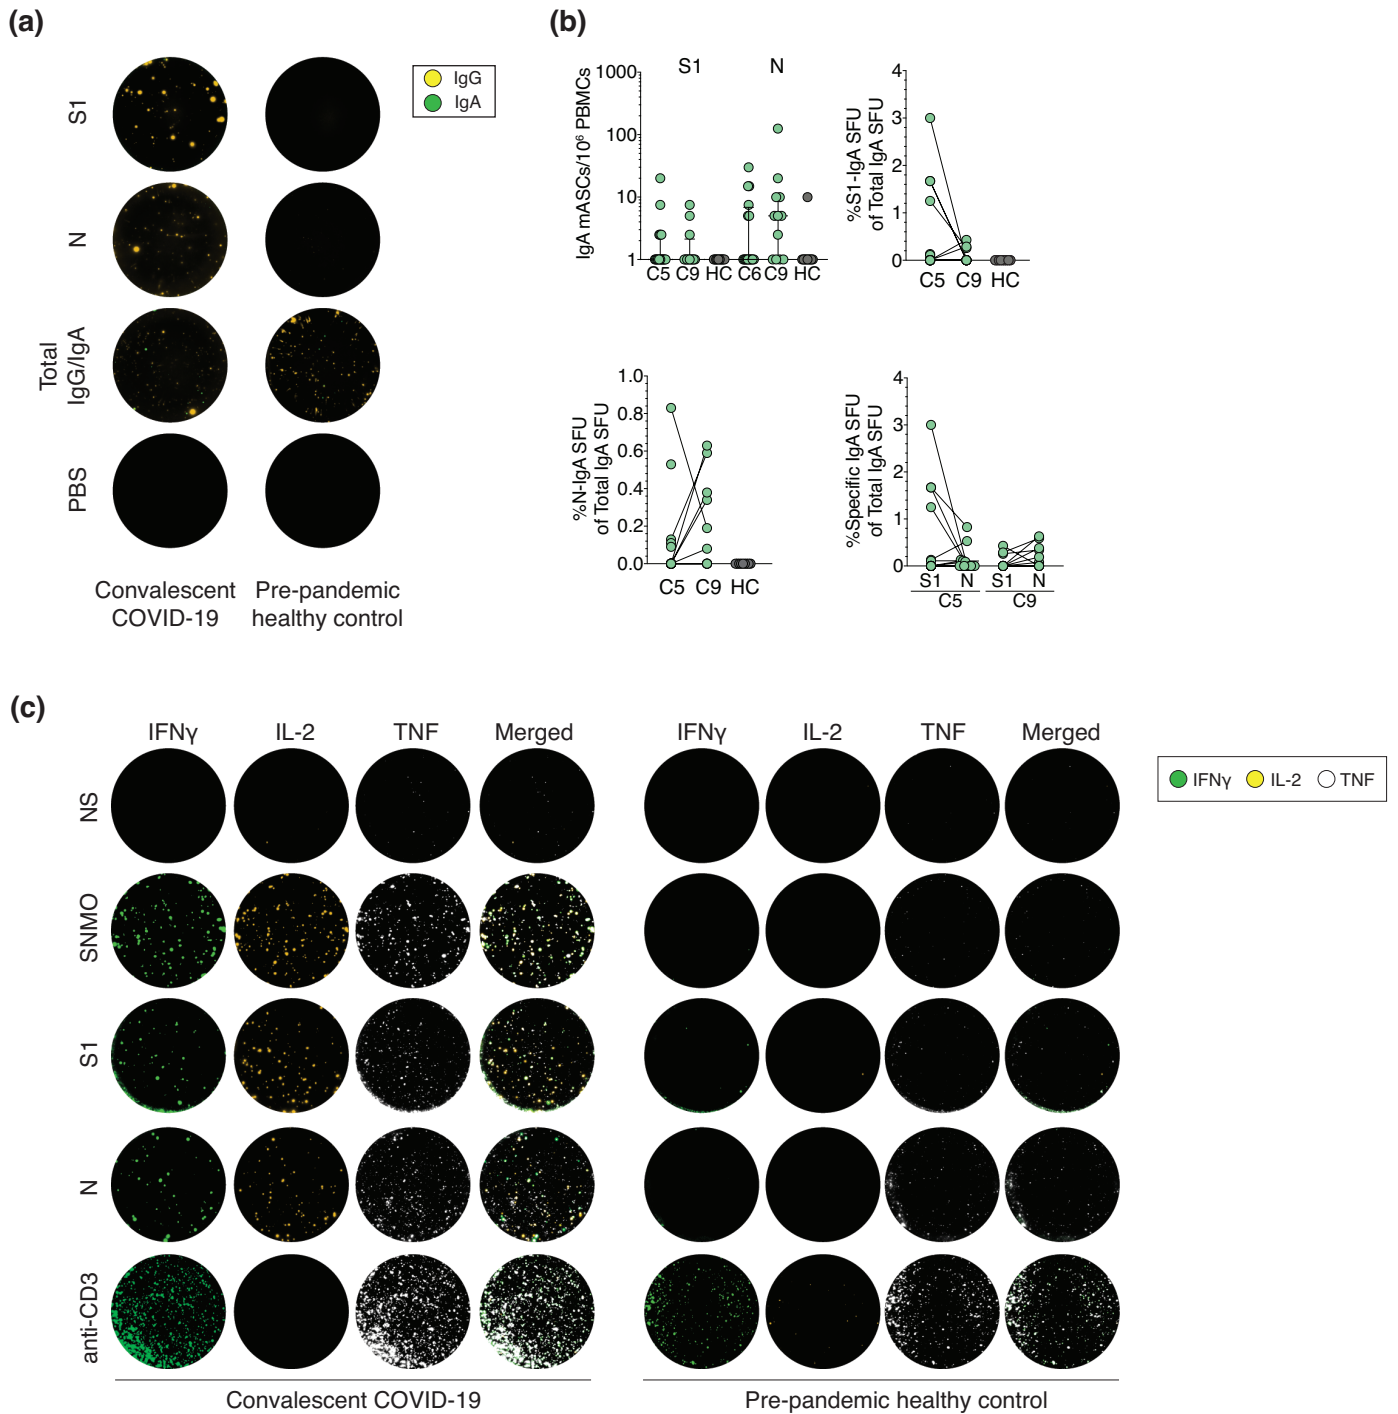

**Supplementary Figure 2. Memory B cell and T cell FluoroSpots.** (a) Representative wells of S1- and N-specific IgG mASCs or total IgG and IgA mASCs from a COVID-19 patient at 9-month convalescence and from a pre-pandemic healthy control. (b) IgA mASCs per million PBMCs at 5- (C5) and 9-month (C9) convalescence also represented as percent of total IgA mASCs. The final plot compares S1- and N-specific IgA mASCs as percent of total IgA mASCs at C5 and C9. (c) Representative wells from memory T cell FluoroSpot assay from a COVID-19 patient at 9-month convalescence and a pre-pandemic healthy control, either non-stimulated (NS), stimulated with SNMO, S1, N peptide pools, or with anti-CD3. Green – IFN $\gamma$ -secreting cells, yellow – IL-2-secreting cells, and white – TNF-secreting cells.

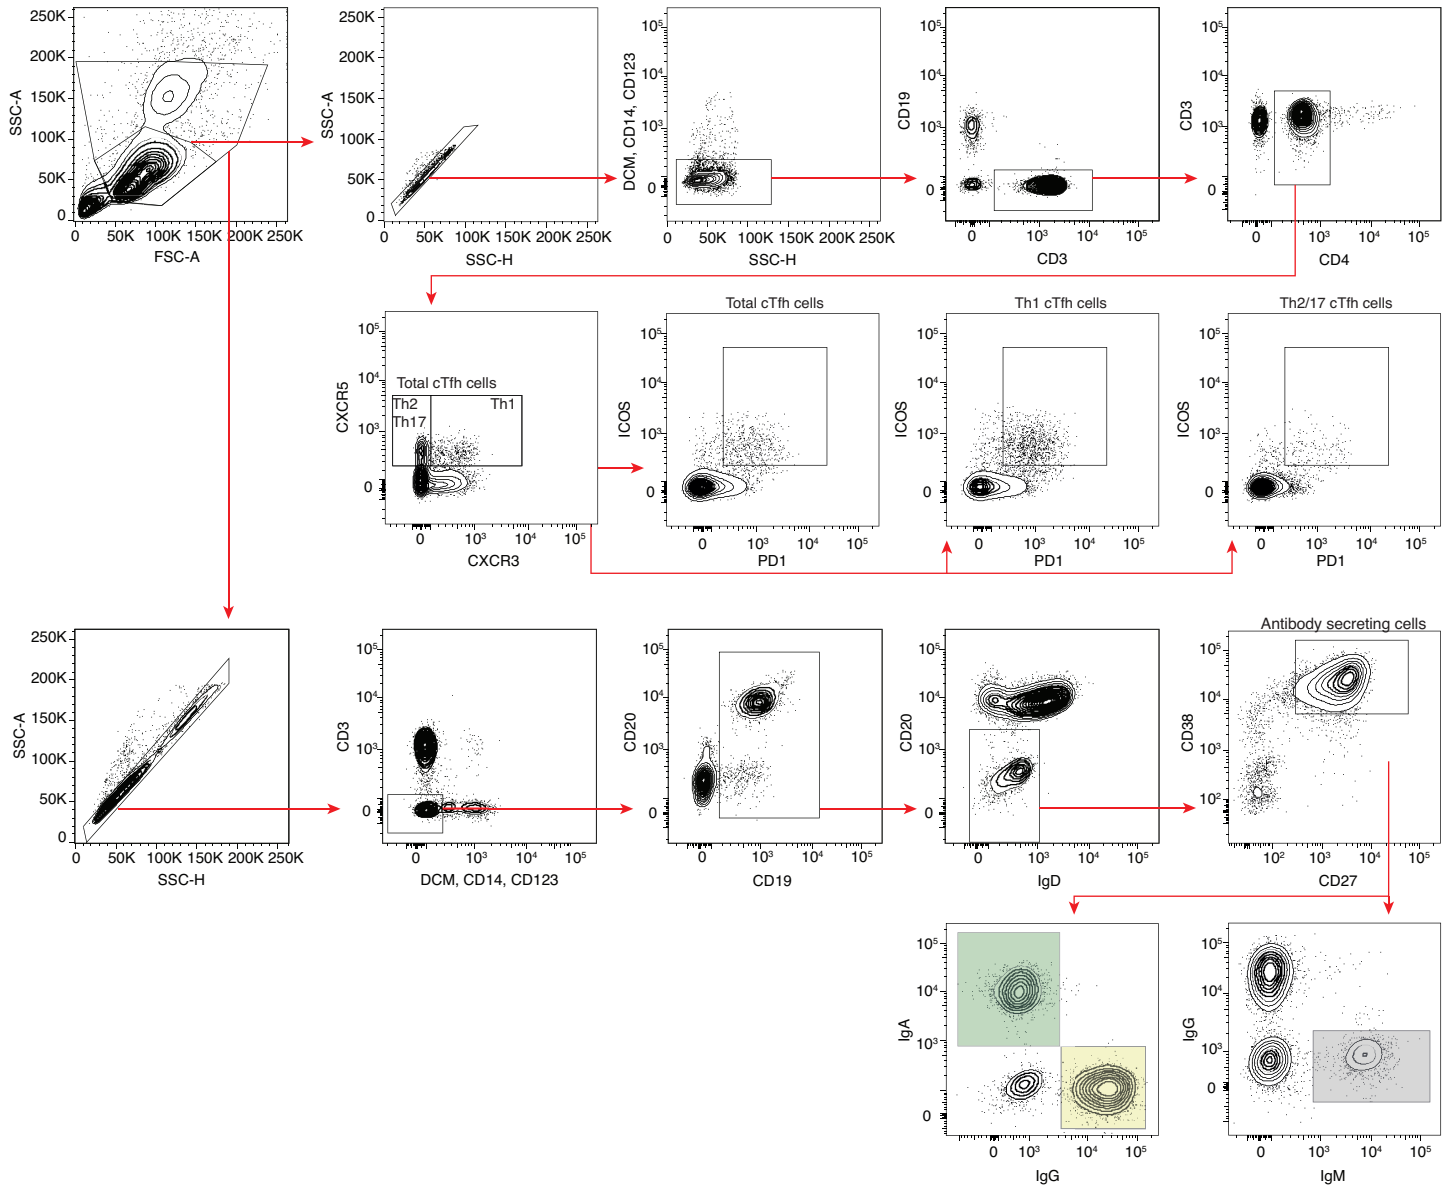

**Supplementary Figure 3. Flow cytometry gating strategy for cTfh cells and antibody-secreting cells.** Activated cTfh cells were defined as ICOS<sup>+</sup>PD1<sup>+</sup> of (i) total cTfh cells (CD4<sup>+</sup>CXCR5<sup>+</sup>), (ii) Th1-polarized cTfh cells (CXCR5<sup>+</sup> CXCR3<sup>+</sup>) or (iii) Th2/17- polarized cTfh cells (CXCR5<sup>+</sup> CXCR3<sup>+</sup>). Antibody-secreting cells were gated from an extended lymphocyte gate and defined as CD38<sup>high</sup> CD27<sup>high</sup> cells gated on live CD14<sup>-</sup> CD123<sup>-</sup> CD3<sup>-</sup> CD19<sup>+</sup> CD20<sup>-</sup> IgD<sup>-</sup> cells.
